# Supplementary material for: Effects of Drainage on Carbon Stock in Hemiboreal Forests: Insights from a 54-Year Study
Source: MDPI journal article supplement (doi:10.3390/su152416622), 2023-12-06
Supplement: s1 [file s1]

**Table S1.** Results of linear mixed effect model of soil penetration resistance

| Soil Penetration                |           |               |          |
|---------------------------------|-----------|---------------|----------|
| Predictors                      | Estimates | CI            | <i>p</i> |
| (Intercept)                     | 0.37      | 0.29 – 0.45   | <0.001   |
| Depth [10 20]                   | -0.04     | -0.10 – 0.01  | 0.123    |
| Depth [20 40]                   | -0.05     | -0.11 – 0.01  | 0.090    |
| Depth [40 80]                   | -0.03     | -0.09 – 0.03  | 0.297    |
| Site type [CP]                  | 0.28      | 0.16 – 0.40   | <0.001   |
| Site type [Sph]                 | 0.28      | 0.17 – 0.39   | <0.001   |
| Water                           | 0.00      | 0.00 – 0.01   | <0.001   |
| Depth [10 20] * Site type [CP]  | 0.10      | -0.03 – 0.24  | 0.128    |
| Depth [20 40] * Site type [CP]  | -0.07     | -0.21 – 0.06  | 0.301    |
| Depth [40 80] * Site type [CP]  | -0.24     | -0.38 – -0.11 | 0.001    |
| Depth [10 20] * Site type [Sph] | 0.18      | 0.06 – 0.29   | 0.003    |
| Depth [20 40] * Site type [Sph] | -0.10     | -0.22 – 0.01  | 0.075    |
| Depth [40 80] * Site type [Sph] | -0.26     | -0.37 – -0.14 | <0.001   |
| Random Effects                  |           |               |          |
| $\sigma^2$                      |           | 0.01          |          |
| $\tau_{00}$ Pl                  |           | 0.00          |          |
| ICC (Sample plot)               |           | 0.19          |          |
| N Pl                            |           | 29            |          |
| Observations                    |           | 116           |          |
| Marginal R2 / Conditional R2    |           | 0.585 / 0.662 |          |

**Table S2.** Factors affecting soil penetration resistance based on analysis of variance (ANOVA) results

| Variables         | Sum of squares | Mean square | df | F value | <i>p</i> value |
|-------------------|----------------|-------------|----|---------|----------------|
| Depth             | 0.707          | 0.236       | 3  | 30.589  | <0.001         |
| Site type         | 0.327          | 0.164       | 2  | 21.220  | <0.001         |
| Water             | 0.136          | 0.136       | 1  | 17.642  | <0.001         |
| Depth * Site type | 0.573          | 0.096       | 6  | 12.395  | <0.001         |

**Table S3.** Results of linear mixed effect model of soil carbon stock

| Soil Carbon Stock            |           |                 |                  |
|------------------------------|-----------|-----------------|------------------|
| Predictors                   | Estimates | CI              | <i>p</i>         |
| (Intercept)                  | 13.96     | 3.04 – 24.87    | <b>0.013</b>     |
| Depth [0 10]                 | 59.37     | 48.69 – 70.06   | <b>&lt;0.001</b> |
| Depth [10 20]                | 54.41     | 43.72 – 65.09   | <b>&lt;0.001</b> |
| Depth [20 40]                | 107.62    | 96.93 – 118.30  | <b>&lt;0.001</b> |
| Depth [40 80]                | 222.02    | 211.34 – 232.71 | <b>&lt;0.001</b> |
| Site type [CP]               | -27.06    | -48.06 – -6.06  | <b>0.012</b>     |
| Site type [Sph]              | -34.79    | -52.63 – -16.94 | <b>&lt;0.001</b> |
| Random Effects               |           |                 |                  |
| $\sigma^2$                   |           | 438.08          |                  |
| $\tau_{00}$ Pl               |           | 288.45          |                  |
| ICC (Sample plot)            |           | 0.40            |                  |
| N Pl                         |           | 30              |                  |
| Observations                 |           | 150             |                  |
| Marginal R2 / Conditional R2 |           | 0.890 / 0.934   |                  |

**Table S4.** Factors affecting soil carbon stock based on analysis of variance (ANOVA) results

| Variables         | Sum of Squares | Mean Square | df | F value | <i>p</i> value |
|-------------------|----------------|-------------|----|---------|----------------|
| Depth             | 8411003        | 210276      | 4  | 526.209 | <0.001         |
| Site type         | 7269           | 3634        | 2  | 9.095   | <0.001         |
| Depth * Site type | 7660           | 958         | 8  | 2.396   | <0.05          |
